# Supplementary material
Source: PubMed Central journal article supplement (PMC2919139)
Supplement: supp_M110.135848_jbc.M110.135848-1.pdf [file supp_M110.135848_jbc.M110.135848-1.pdf]

## Supplemental Information (Zwolak et al.)

### Figure Legends

Supplemental Fig. 1. CP $\alpha$ 1 $\beta$ 2  $^{15}\text{N}$ - $^1\text{H}$ -TROSY HSQC spectrum. The HSQC spectrum of CP was recorded at 32 °C using an 800 MHz spectrometer equipped with a pulsed-field gradient cryogenically cooled probe using 32 transients with 1 s recycle delay between acquisitions, maximum acquisition of 61.4 ms in the indirect dimension.

Supplemental Fig. 2. CP $\alpha$  C-terminal deletion mutants elucidate the residues involved in V-1 and barbed end binding. Fluorescence anisotropy and pyrene-actin fluorescence measurements were performed as in Figure 8. Wild-type CP is shown in black in all panels. CP $\alpha$ 1( $\Delta$ C10) $\beta$ 2 (red) bound both V-1 (A) and barbed ends (C) with wild-type affinity while CP $\alpha$ 1( $\Delta$ C28) $\beta$ 2 (cyan) bound V-1 (B) and barbed ends (D) weakly (see Table 2 for numerical values).

Supplemental Figure 1

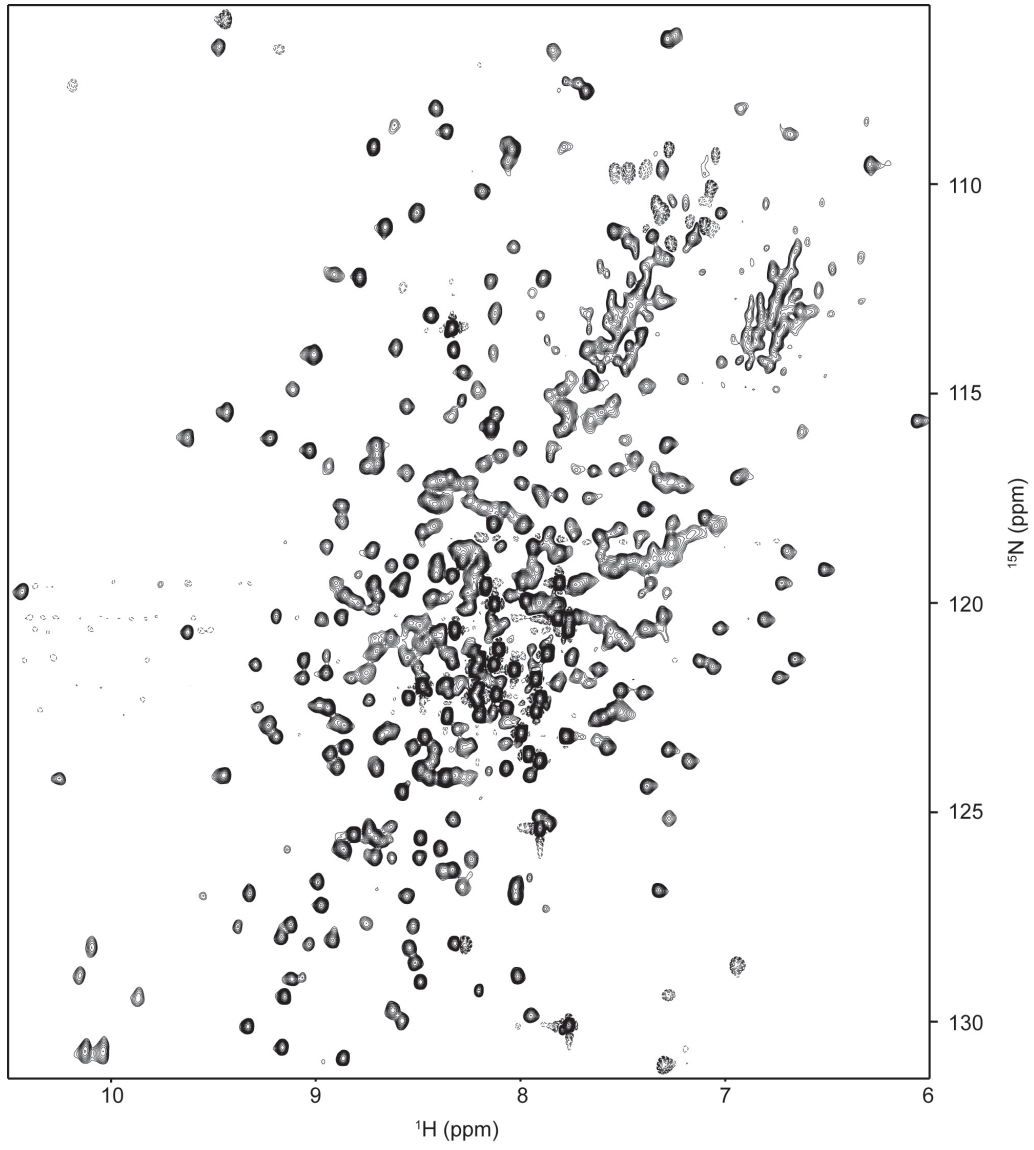

Supplemental Figure 2

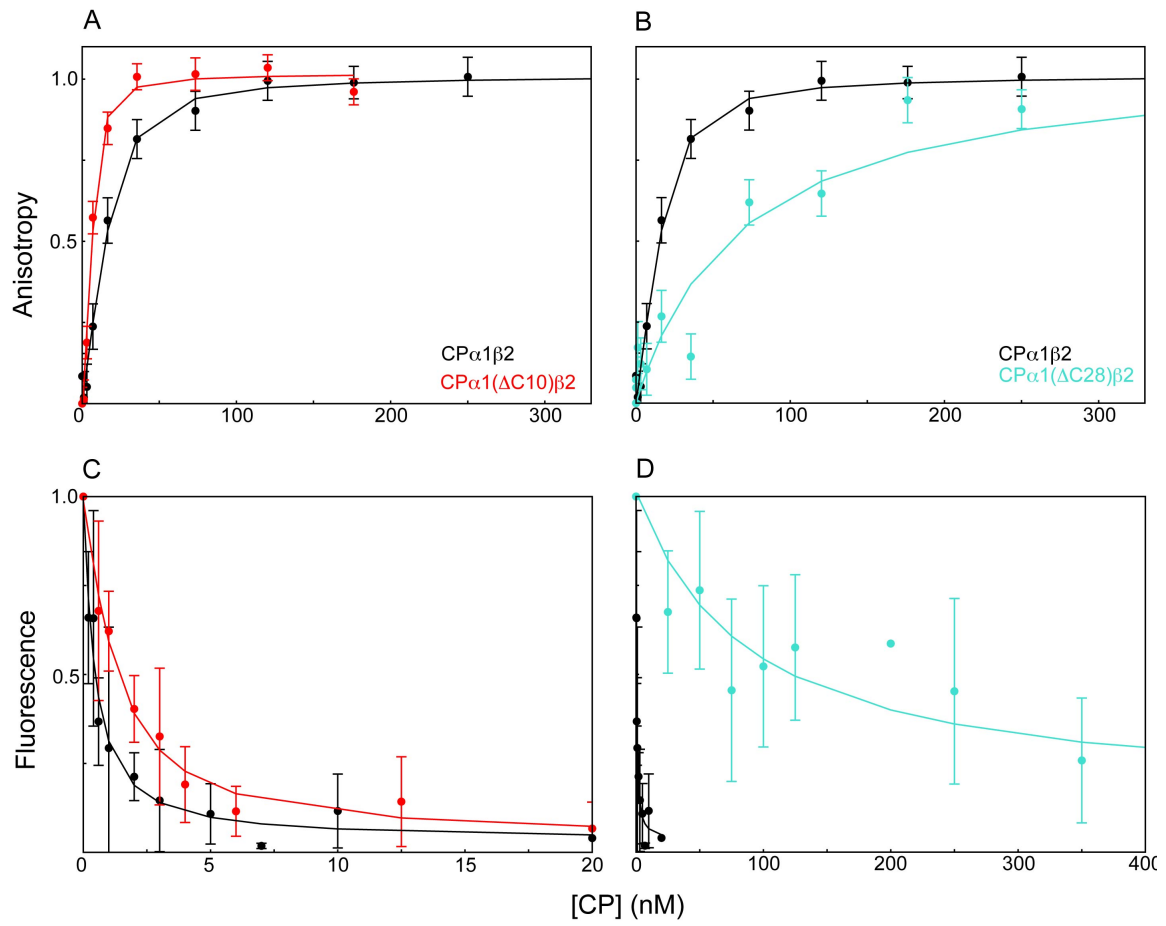

**Supplemental Table 1. CP secondary shift average and secondary structure comparison to crystal structure**

| chicken CP / mouse CP |             |                                         |                  |                   |                 |                                         |                  |
|-----------------------|-------------|-----------------------------------------|------------------|-------------------|-----------------|-----------------------------------------|------------------|
| $\alpha 1/\alpha 1$   |             |                                         |                  | $\beta 1/\beta 2$ |                 |                                         |                  |
| 2°                    | Residues    | $\langle 2^\circ \text{ shift} \rangle$ |                  | 2°                | Residues        | $\langle 2^\circ \text{ shift} \rangle$ |                  |
|                       |             | $^{13}\text{C}^\alpha$                  | $^{13}\text{C}'$ |                   |                 | $^{13}\text{C}^\alpha$                  | $^{13}\text{C}'$ |
| H1                    | D10-T22     | 2.73                                    | 1.78             | H1                | D3-M13/L12      | 2.00                                    | 1.49             |
| H2                    | F29-L40     | 2.63                                    | 1.58             | H2                | I21-L31         | 2.77                                    | 1.2              |
| H3                    | D43-D60     | 2.14                                    | 1.62             | H3                | C36-S42         | 2.41                                    | 1.7              |
| S1                    | T63-V65     | -1.57                                   | -1.27            | S1                | K48-D52         | -1.68                                   | -1.3             |
| S2                    | V74-I76     | -2.83                                   | -2.37            | S2                | K57-L61         | -1.56                                   | -1.06            |
| S3                    | R86-L88     | -2.17                                   | -1.23            | S3                | S70-R72         | -1.37                                   | -1.6             |
| S4                    | I94-K97     | -2.38                                   | -1.33            | H4                | A91-F112        | 2.91                                    | 1.99             |
| H4                    | K118-A135   | 2.48                                    | 1.99             | S5                | V-116-D123/W122 | -1.33                                   | -0.7             |
| S5                    | G139-I148   | -1.17                                   | -1.39            | S6                | G127-A137       | -1.32                                   | -1.78            |
| S6                    | Q151-Q164   | -1.40                                   | -1.56            | S7                | I144-E158       | -1.38                                   | -1.14            |
| S7                    | W169-T180   | -1.35                                   | -0.70            | S8                | T164-K181       | -1.36                                   | -2.15            |
| S8                    | T/S185-Y198 | -1.10                                   | -1.32            | S9                | G185/T186-      | -1.04                                   | -1.87            |
| S9                    | V204-       | -1.22                                   | -1.67            | H5                | H209/N212-L243  | 2.89                                    | 1.42             |
| H5a/H5                | V/I222-D252 | 2.79                                    | 2.61             | H6/-              | Q/S253-T/K267   | 0.77                                    | 0.62             |
| H5b/-                 | T254-L258   | 0.75                                    | 0.23             |                   |                 |                                         |                  |
| H6                    | W271-I274   | 2.28                                    | 1.98             |                   |                 |                                         |                  |

**Supplemental Table 1.** Comparison of secondary structures of chicken CP $\alpha 1\beta 1$  to mouse CP $\alpha 1\beta 2$ . Chicken CP secondary structures are from the crystal structure. Mouse CP secondary structures were determined from NMR data. The  $\alpha$  subunits are compared on the left;  $\beta$  subunits, on right, with the chicken naming being the same as in the mouse, except as indicated by a “/” where the mouse sequence or structure is different from that of chicken. Secondary structures which could not be
